# Supplementary material
Source: MDPI journal article supplement (https://www.mdpi.com/2673-9976/4/1/36)
Supplement: s1 [file s1]

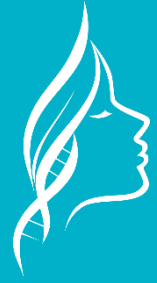

# Building a pathway for diversity in plant sciences in Argentina: highlighting the work of women scientists through virtual activities

Gabriela A. Auge <sup>1\*</sup>, María José de Leone <sup>2</sup>, Rocío Deanna <sup>3</sup>, Sonia Oliferuk <sup>4</sup>, Pamela A. Ribone <sup>5</sup>, Elina Welchen <sup>6</sup>.

@ARGplantwomen  
plantbioarg@gmail.com  
www.argplantwomen.weebly.com

<sup>1</sup> iB3, School of Exact and Natural Sciences, University of Buenos Aires, Argentina. <sup>2</sup> Fundación Instituto Leloir, IIBBA-CONICET, Argentina. <sup>3</sup> University of Colorado, Boulder, United States of America. <sup>4</sup> Instituto Tecnológico Chascomús (INTECH, CONICET-UNSAM), Argentina. <sup>5</sup> The Sainsbury Laboratory Cambridge University, United Kingdom. <sup>6</sup> Instituto de Agrobiotecnología del Litoral (CONICET-UNL) - FBCB (UNL), Argentina.

## Where we were...

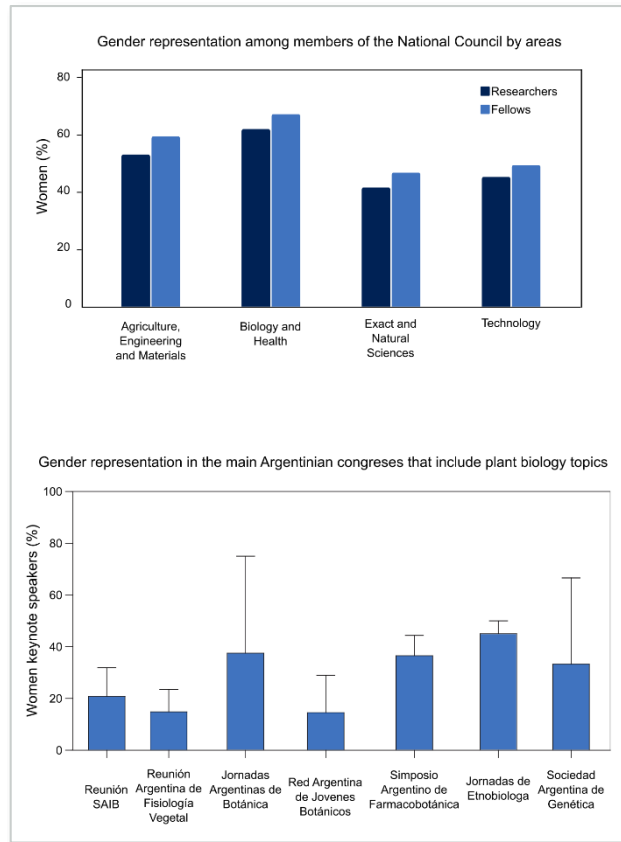

## What we did...

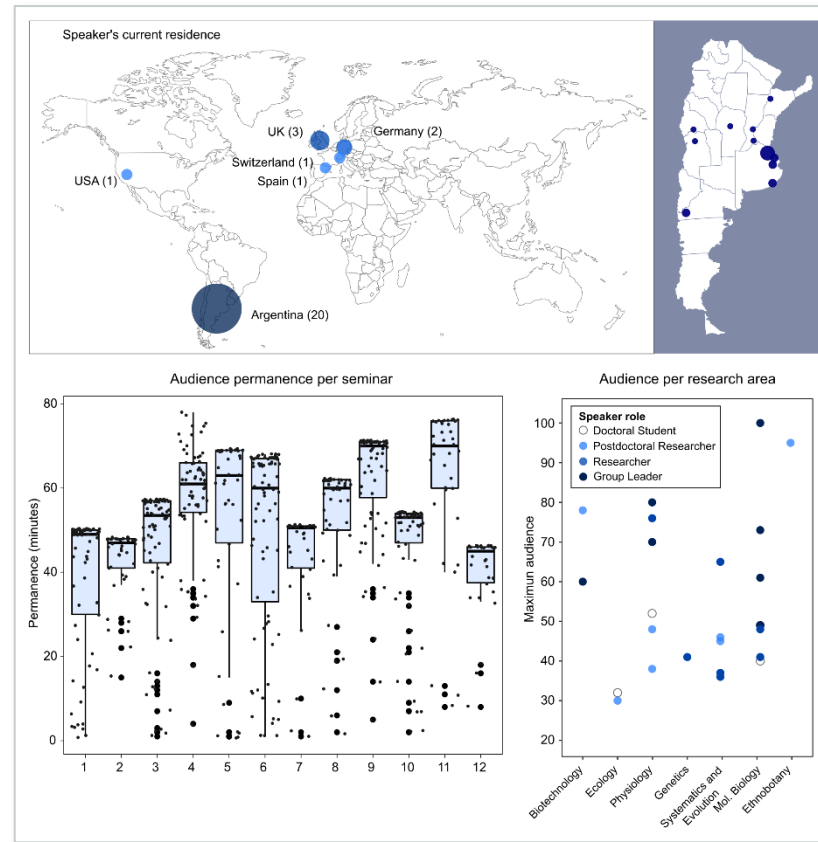

## What we have achieved...

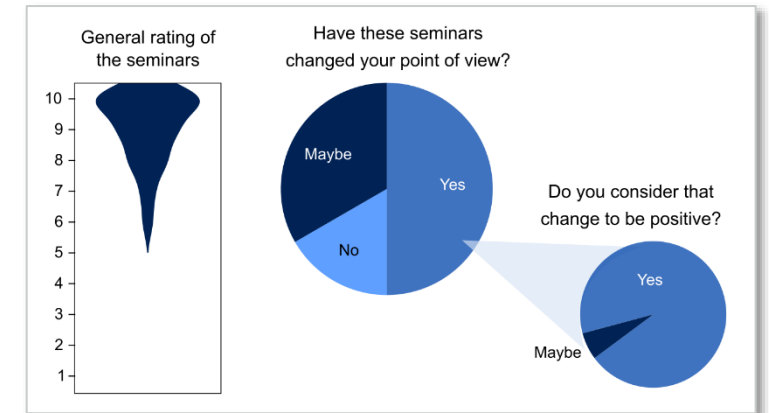

## What we are planning...

- Increase geographical representation
- Personal development Webinars
- Teacher training workshops
